# Supplementary material
Source: publisher figshare collection journal article supplement (https://karger.figshare.com/ndownloader/files/14100455)
Supplement: Supplementary file 1 [file 14100455]

**Can early introduction of palliative care limit intensive care, emergency and hospital admissions in patients with severe COPD? A pilot randomized study**

**Figures for on-line supplement:**

**Legend of figures**:

Figures in on-line supplement: For all figures: pink squares: EPC group; gray triangles: SC group

Figure 1S: Hospital Anxiety and Depression score for **Anxiety** at T0 and during subsequent home visits. Difference between groups is not significant.

Figure 2S: Hospital Anxiety and Depression score for **Depression** at T0 and during subsequent home visits. Difference between groups not significant.

Figure 3S: **SF-36 scores for item Vitality** at T0 and during subsequent home visits. Difference between groups is not significant. Horizontal line shows expected values in a normal Swiss population matched for age and gender. Values suggest a « study effect » at visits 1 and 2.

Figure 4S: **SF-36 scores for Mental Health** at T0 and during subsequent home visits. Difference between groups is not significant. Horizontal line shows expected values in a normal Swiss population matched for age and gender.

Figure 5S: **SF-36 scores for General Health** at T0 and during subsequent home visits. Difference between groups is not significant. Horizontal line shows expected values in a normal Swiss population matched for age and gender.

Figure 6S: **SF-36 scores for Physical Function** at T0 and during subsequent home visits. Difference between groups is not significant. Horizontal line shows expected values in a normal Swiss population matched for age and gender.

Figure 7S: **SF-36 scores for Role Physical** at T0 and during subsequent home visits. Difference between groups is not significant. Horizontal line shows expected values in a normal Swiss population matched for age and gender.

Figure 8S: **SF-36 scores for item Role Emotional** at T0 and during subsequent home visits. Difference between groups is not significant. Horizontal line shows expected values in a normal Swiss population matched for age and gender.

Figure 9S: **SF-36 scores for Social Functioning** at T0 and during subsequent home visits. Difference between groups is not significant. Horizontal line shows expected values in a normal Swiss population matched for age and gender.

Figure 10S: **SF-36 scores for Health Transition** at T0 and during subsequent home visits. Difference between groups is not significant. Horizontal line shows expected values in a normal Swiss population matched for age and gender.

Figure 11S. **Edmonton Symptom Assessment Scale scores** for each item at inclusion and during follow-up for patients in Early Palliative Care Group (n=26)

**On –line supplement data : tables and figures**

On-line Supplement: Table 1S. Marital status, education level, religion, advanced care planning and medication.

On-line supplement: Figure 1S : Hospital Anxiety and Depression score for **Anxiety** at T0 and during subsequent home visits.

On-line supplement: Figure 2S: Hospital Anxiety and Depression score for **Depression** at T0 and during subsequent home visits.

On-line supplement: Figure 3S: **SF-36 scores for item Vitality** at T0 and during subsequent home visits.

On-line supplement: Figure 4S: **SF-36 scores for Mental Health** at T0 and during subsequent home visits.

On-line supplement: Figure 5S: **SF-36 scores for General Health** at T0 and during subsequent home visits. Difference between groups is not significant.

On-line supplement: Figure 6S: **SF-36 scores for Physical Function** at T0 and during subsequent home visits. Difference between groups is not significant.

On-line supplement: Figure 7S: **SF-36 scores for Role Physical** at T0 and during subsequent home visits. Difference between groups is not significant.

On-line supplement: Figure 8S : **SF-36 scores for item Role Emotional** at T0 and during subsequent home visits. Difference between groups is not significant.

On-line supplement: Figure 9S: **SF-36 scores for Social Functioning** at T0 and during subsequent home visits. Difference between groups is not significant.

On-line supplement: Figure 10S: **SF-36 scores for Health Transition** at T0 and during subsequent home visits. Difference between groups is not significant.

On-line Supplement. Figure 11S. **Edmonton Symptom Assessment Scale scores** for each item at inclusion and during follow-up for patients in Early Palliative Care Group (n=26)
